# Supplementary material for: Characterization of the Common Japonica-Originated Genomic Regions in the High-Yielding Varieties Developed from Inter-Subspecific Crosses in Temperate Rice (Oryza sativa L.)
Source: MDPI journal article supplement (doi:10.3390/genes11050562), 2020-05-18

**Figure S1.** Pedigrees of eight HYVs used in this study. **(A)** Tongil, **(B)** Minghui 63, **(C)** Cheongcheongbyeo, **(D)** Milyang 23, **(E)** Nampungbyeo, **(F)** Hanareumbyeo, **(G)** Dasanbyeo, **(H)** Takanari.

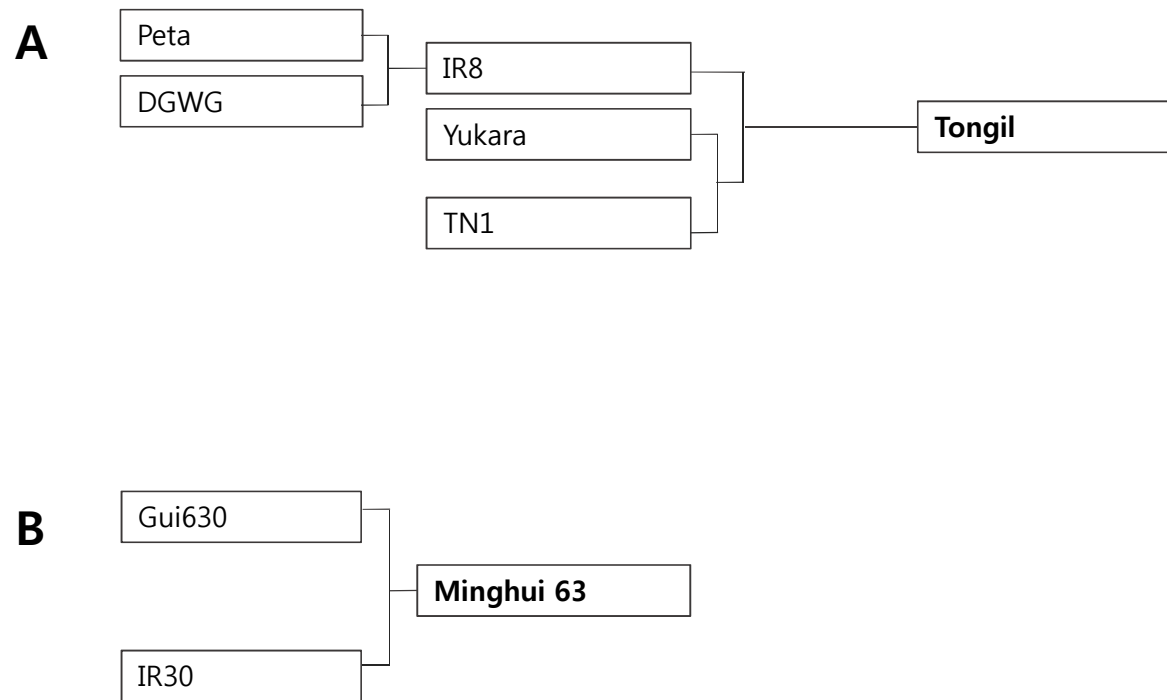

**C**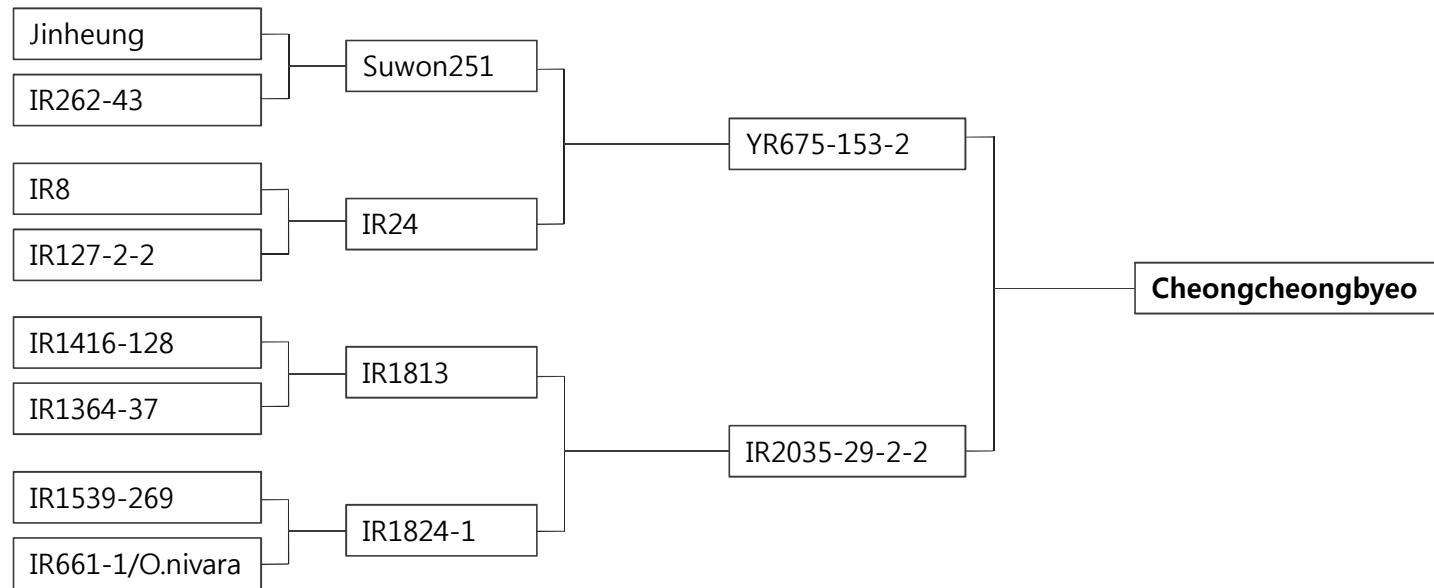**D**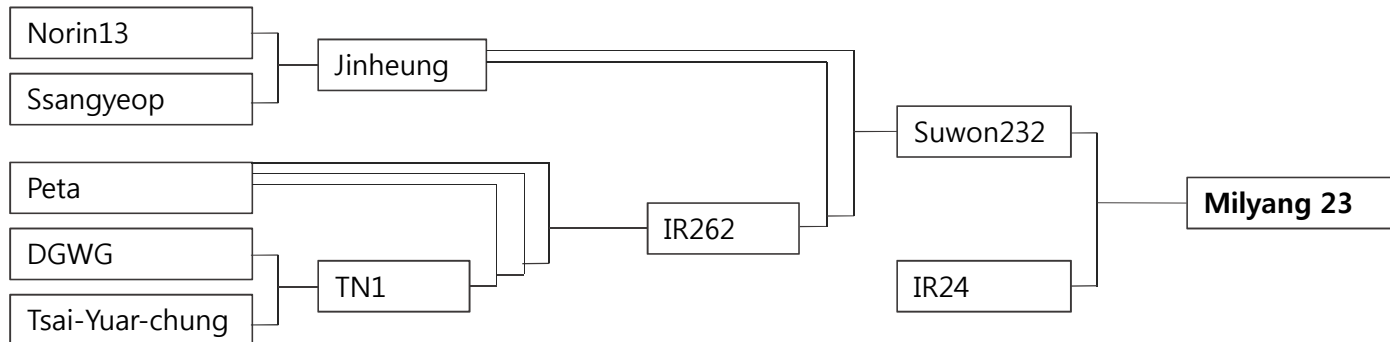

**E**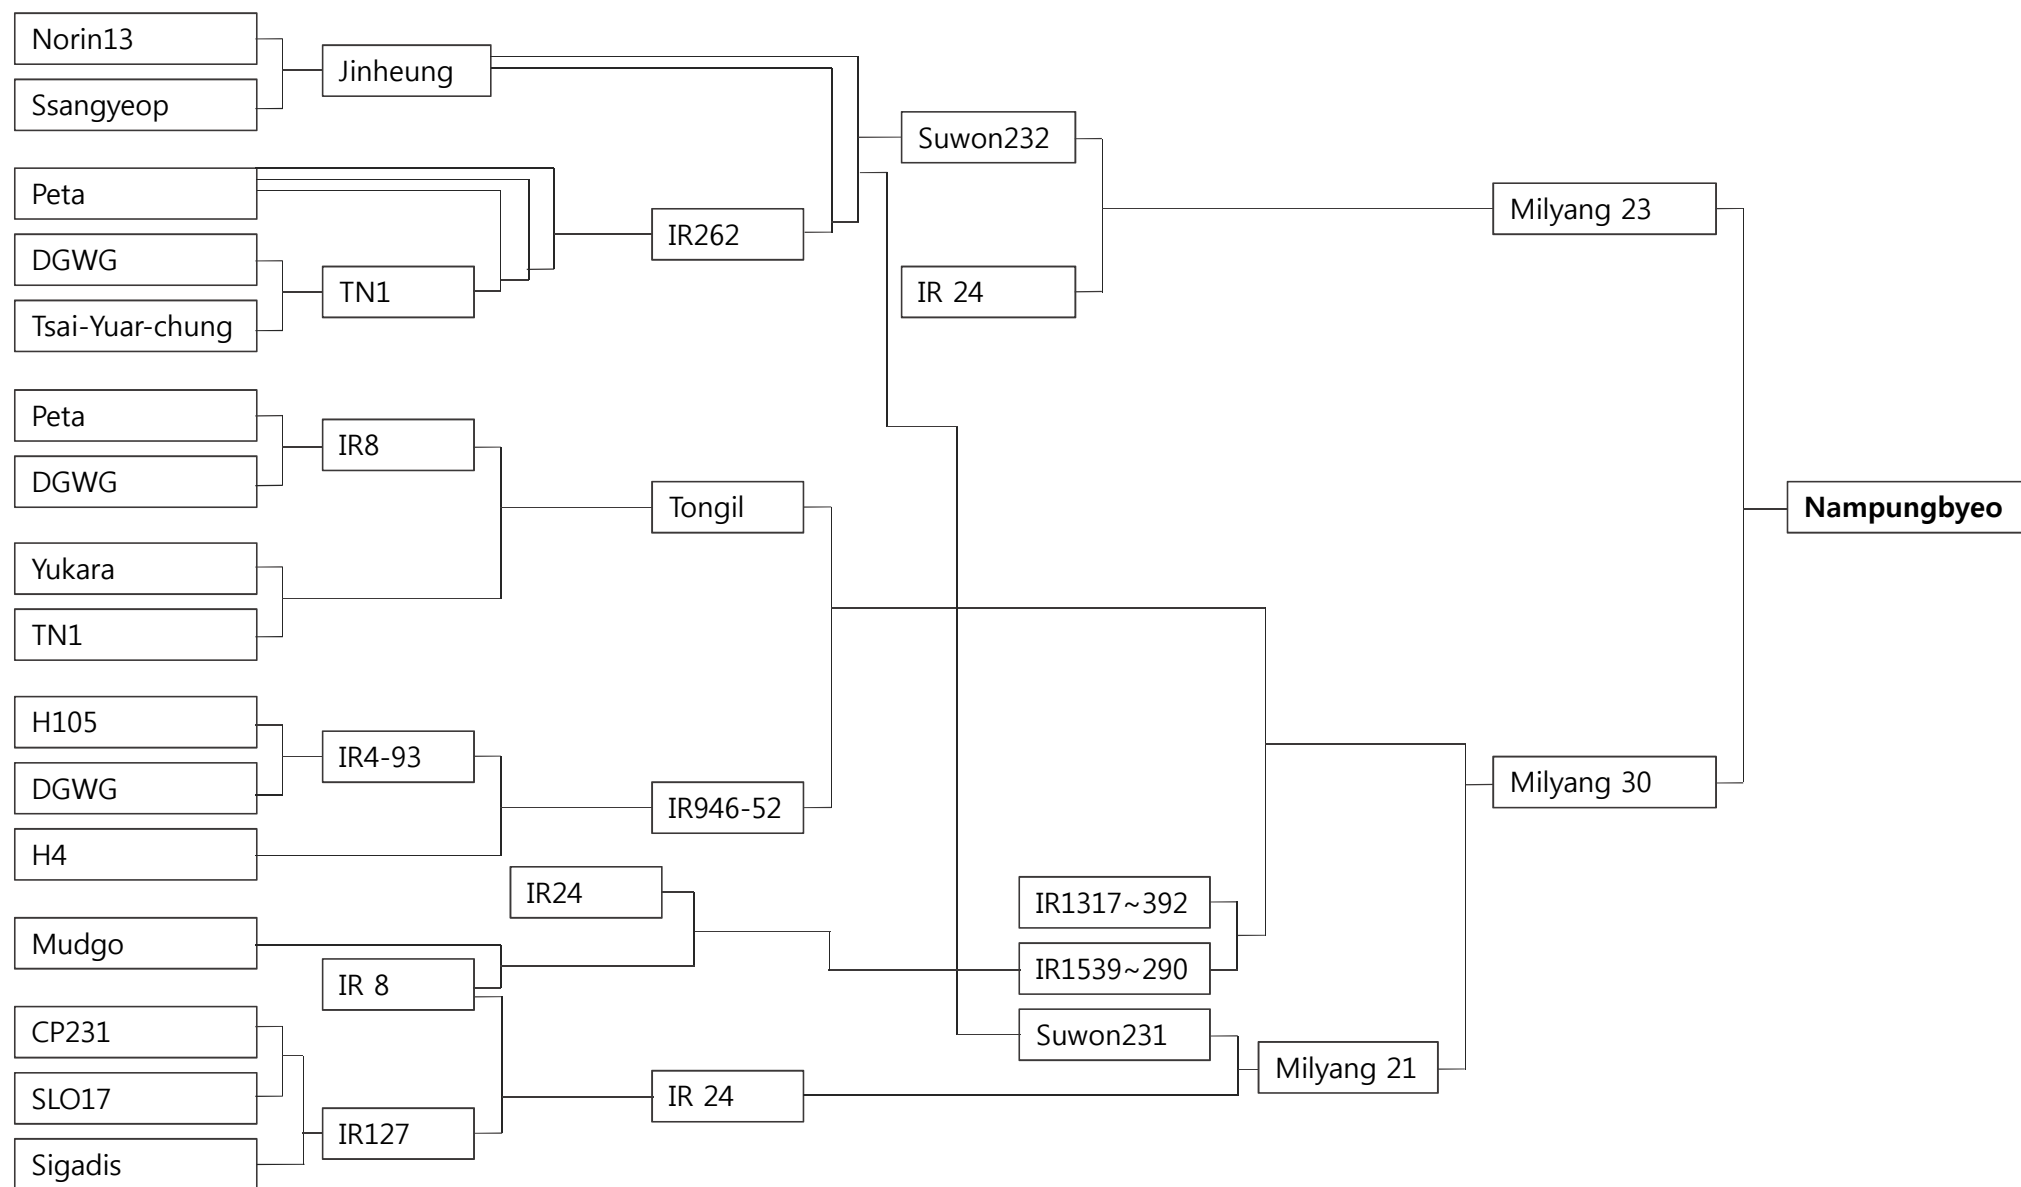

**F**

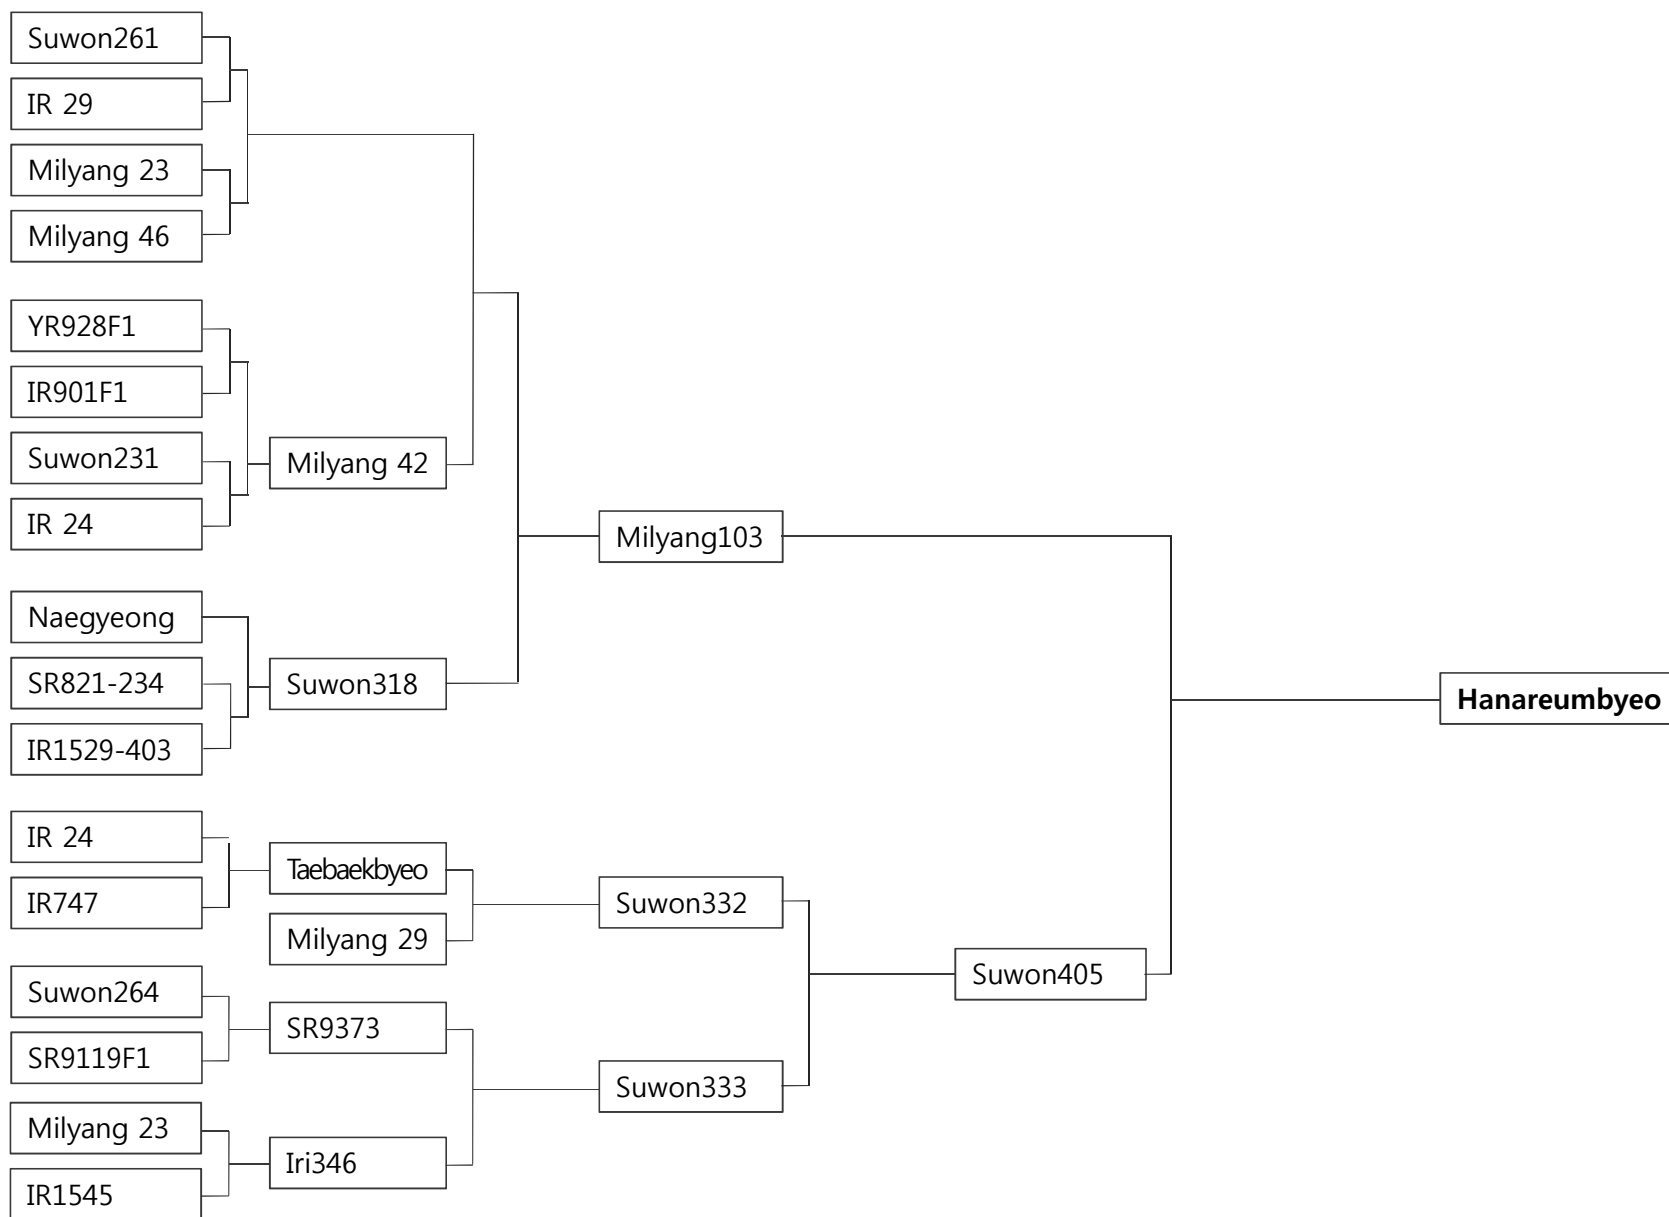

**G**

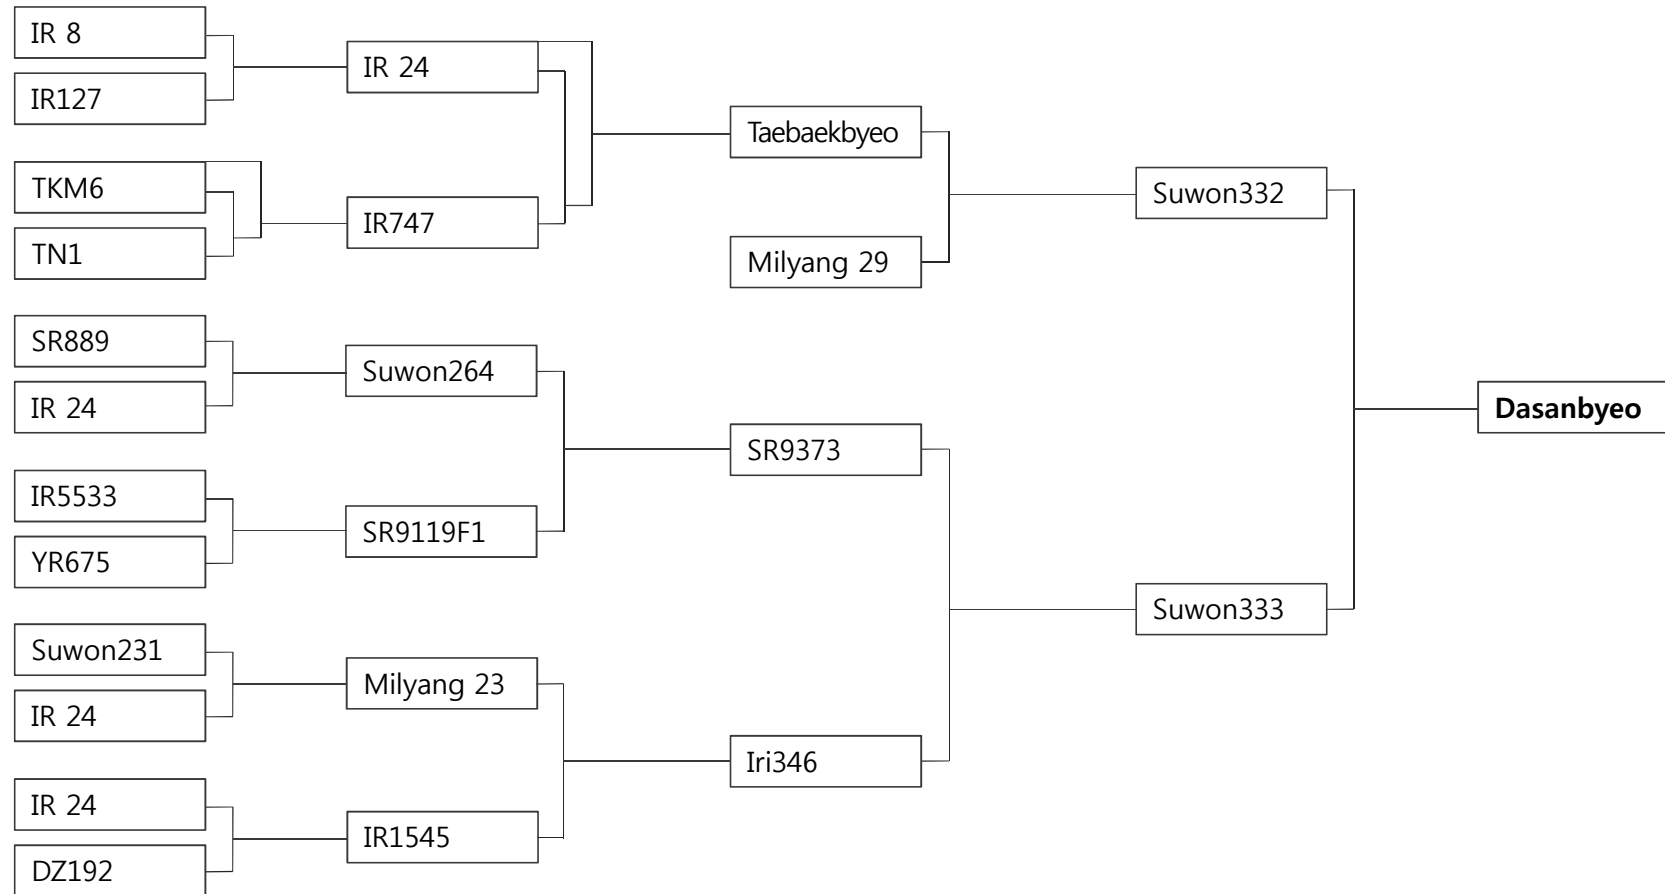

H

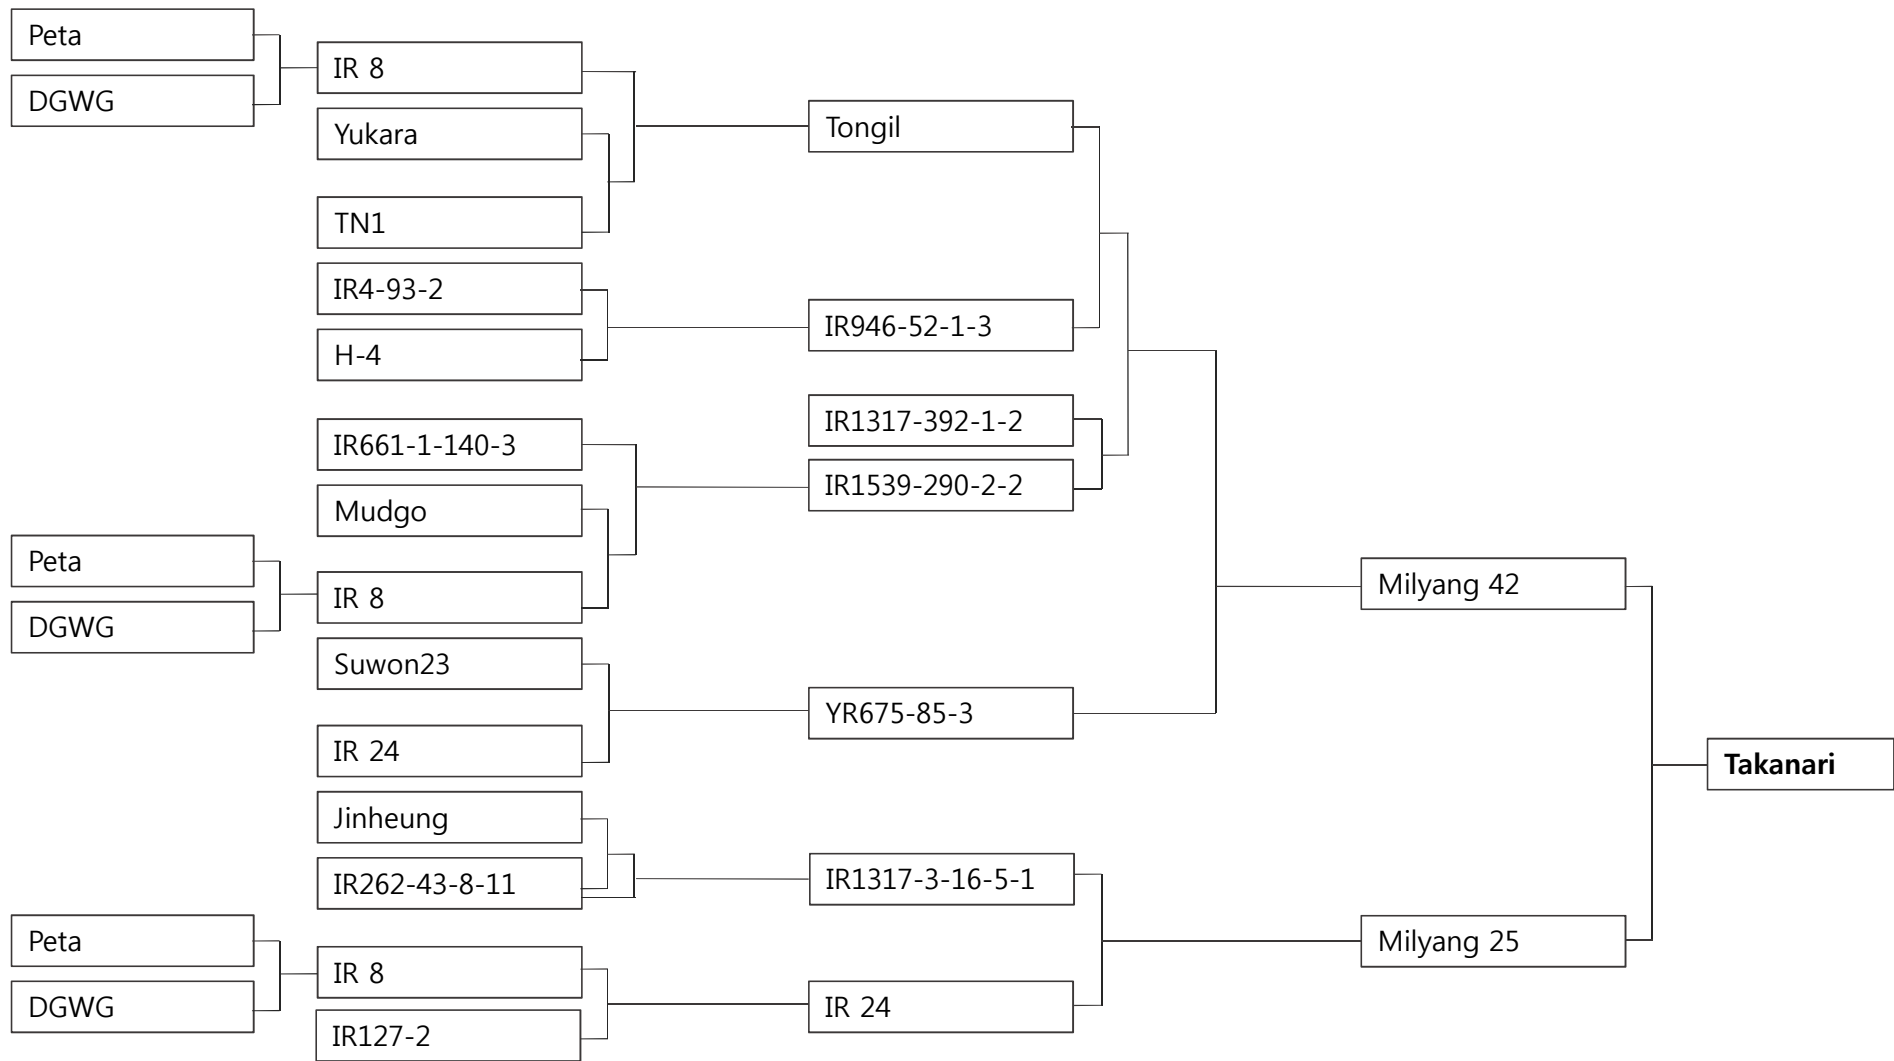

Supplement: s1 [file s1]
